# Supplementary material for: Prudent-Active and Fast-Food-Sedentary Dietary-Lifestyle Patterns: The Association with Adiposity, Nutrition Knowledge and Sociodemographic Factors in Polish Teenagers—The ABC of Healthy Eating Project
Source: Nutrients. 2018 Dec 15;10(12):1988. doi: 10.3390/nu10121988 (PMC6315952; doi:10.3390/nu10121988)
Supplement: Supplementary file 1 [file nutrients-10-01988-s001.pdf]

# Supplementary material: Prudent-Active and Fast-food-Sedentary dietary-lifestyle patterns: the association with adiposity, nutrition knowledge and sociodemographic factors in Polish teenagers. The ABC of Healthy Eating Project.

Lidia Wadolowska, Jadwiga Hamulka, Joanna Kowalkowska, Małgorzata Kostecka, Katarzyna Wadolowska, Renata Biezanowska-Kopec, Ewa Czarniecka-Skubina, Witold Kozirok, Anna Piotrowska

**Table S1.** Standardized means of components of dietary-lifestyle patterns identified with cluster analysis.

| Variables                                      | Prudent-Active | Fast-Food-Sedentary | notPrudent-notFast-Food-LowActive | p-Value |
|------------------------------------------------|----------------|---------------------|-----------------------------------|---------|
| Sample size                                    | 454            | 214                 | 881                               |         |
| Consumption of                                 |                |                     |                                   |         |
| Breakfast <sup>a</sup>                         | <b>0.20</b>    | −0.48               | 0.01                              | ****    |
| School meal <sup>b</sup>                       | <b>0.37</b>    | −0.47               | −0.08                             | ****    |
| Frequency consumption of <sup>c</sup>          |                |                     |                                   |         |
| Vegetables                                     | <b>0.85</b>    | −0.34               | −0.36                             | ****    |
| Fruits                                         | <b>0.84</b>    | −0.31               | −0.35                             | ****    |
| Fruit or vegetable juices                      | <b>0.72</b>    | 0.00                | −0.37                             | ****    |
| Dairy products                                 | <b>0.51</b>    | 0.04                | −0.28                             | ****    |
| Fish                                           | <b>0.35</b>    | 0.08                | −0.20                             | ****    |
| Fast-foods                                     | −0.21          | <b>1.32</b>         | −0.21                             | ****    |
| Sweetened beverages                            | −0.10          | <b>1.29</b>         | −0.27                             | ****    |
| Energy drinks                                  | −0.23          | <b>1.15</b>         | −0.16                             | ****    |
| Sweets                                         | −0.04          | <b>1.03</b>         | −0.24                             | ****    |
| Screen time <sup>d</sup>                       | −0.30          | <b>1.10</b>         | −0.11                             | ****    |
| Physical activity at school <sup>e</sup>       | <b>0.37</b>    | −0.18               | −0.14                             | ****    |
| Physical activity at leisure time <sup>f</sup> | <b>0.43</b>    | −0.36               | −0.14                             | ****    |

Before standardization the input variables were expressed in: <sup>a</sup> times/day after converting frequencies (into daily frequency): <1 day/week (0), 1 to 3 days/week (0.29), 4 to 6 days/week (0.71), every day (1); <sup>b</sup> times/day after converting frequencies (into daily frequency): <1 day/week (0), 1 to 3 days/week (0.29), 4 to 6 days/week (0.71), every school day (1); <sup>c</sup> times/day after converting frequencies (into daily frequency): never or almost never (0), rarely than once a week (0.06), once a week (0.14), 2–4 times/week (0.43), 5–6 times/week (0.79), every day (1), several times a day (2); <sup>d</sup> scores after converting categories (into scores): <2 h/day (1), 2 to <4 hours/day (2), 4 to <6 h/day (3), 6 to <8 h/day (4), 8 to <10 h/day (5), ≥10 h/day (6); <sup>e</sup> scores after converting categories (into scores): low, *e.g.* most of the time in a sitting position, in class or on breaks (1), moderate, *e.g.* half the time in a sitting position and half the time in motion (2), vigorous, *e.g.* most of the time on the move or on classes related to high physical exertion (3); <sup>f</sup> scores after converting categories (into scores): low, *e.g.* more time spent sitting, watching TV, in front of a computer, reading, light housework, a short walk to 2 h a week (1), moderate, *e.g.* walking, cycling, gymnastics, working at home or other light physical activity performed 2–3 h/week (2), vigorous, *e.g.* cycling, running, working at home or other sports activities requiring physical effort over 3 h/week (3). Food examples by groups: Vegetables, *e.g.* fresh, boiled, baked, stewed; Fruits, *e.g.* fresh or frozen; Dairy products, *e.g.* milk, yoghurt, cottage cheese, cheese; Fish, *e.g.* baked, fried, in vinegar, canned; Fast foods, *e.g.* chips, pizza, hamburgers; Sweetened drinks, *e.g.* cola type, water with syrup, tea type with sugar; Sweets, *e.g.* cookies, sweets, cake, bars of chocolate, chocolate. Statistically significant: \*\*\*\*  $p < 0.0001$ .
